# Supplementary material for: European Spruce Bark Beetle, Ips typographus (L.) Males Are Attracted to Bark Cores of Drought-Stressed Norway Spruce Trees with Impaired Defenses in Petri Dish Choice Experiments
Source: MDPI journal article supplement (doi:10.3390/f13040537), 2022-03-30
Supplement: s1 [file s1]

## Supplementary Material

**Table S1:** Petri dish choice experiments; comparison of bark cores sampled from roofed (R), non-roofed (nR) and control (C) trees; time proportion (mean relative time  $\pm$  std dev) spent by test beetles in sections T and C; mean time ( $\pm$  std dev) until male *Ips typographus* test beetles made a final decision regarding all test runs (replicates) of an experiment; na=not applicable (n=0 or 1).

| Experiments/Pair of samples |        | mean relative time (%) spent by beetles in |           |             | mean time till choice (sec) when beetles decided for |             |      |             |        |             |
|-----------------------------|--------|--------------------------------------------|-----------|-------------|------------------------------------------------------|-------------|------|-------------|--------|-------------|
| T tree                      | C tree | section T                                  | section C | $\pm$ stdev | T                                                    | $\pm$ stdev | C    | $\pm$ stdev | T or C | $\pm$ stdev |
| R1                          | C1     | 68,12                                      | 31,88     | 21,42       | 647                                                  | 898         | 1343 | 996         | 956    | 954         |
| R2                          | C2     | 54,86                                      | 45,14     | 22,05       | 2097                                                 | 1117        | 1506 | 1143        | 1675   | 1127        |
| R3                          | C1     | 56,08                                      | 43,92     | 31,82       | 930                                                  | 695         | 554  | 930         | 769    | 755         |
| R3                          | C2     | 55,23                                      | 44,77     | 20,66       | 1782                                                 | 820         | 1027 | 258         | 1263   | 1058        |
| R4                          | C1     | 41,26                                      | 58,74     | 31,38       | 662                                                  | 516         | 1294 | 1004        | 1041   | 869         |
| R4                          | C2     | 47,95                                      | 52,05     | 28,18       | 1339                                                 | 839         | 705  | 466         | 1054   | 753         |
| R5                          | C2     | 48,26                                      | 51,74     | 25,54       | 942                                                  | 979         | 1248 | 642         | 1135   | 771         |
| R6                          | C1     | 54,18                                      | 45,82     | 32,45       | 1314                                                 | 687         | 1320 | 537         | 1316   | 593         |
| R9                          | C1     | 64,43                                      | 35,57     | 27,13       | 705                                                  | 456         | 182  | na          | 640    | 461         |
| nR1                         | C1     | 53,42                                      | 46,58     | 20,44       | 1497                                                 | 1306        | 1097 | 783         | 1257   | 944         |
| nR1                         | C2     | 48,18                                      | 51,82     | 16,36       | 1758                                                 | 668         | 1277 | 720         | 1536   | 708         |
| nR3                         | C1     | 26,04                                      | 73,96     | 25,42       | 2756                                                 | 1029        | 1362 | 1149        | 1672   | 1154        |
| nR3                         | C2     | 40,83                                      | 59,17     | 25,44       | 1753                                                 | 866         | 1123 | 826         | 1407   | 882         |
| nR4                         | C2     | 43,38                                      | 56,62     | 24,86       | 947                                                  | 640         | 1331 | 863         | 1182   | 788         |
| nR5                         | C2     | 51,90                                      | 48,10     | 23,95       | 1881                                                 | 1071        | 896  | 1197        | 1290   | 1199        |
| nR7                         | C1     | 27,36                                      | 72,64     | 24,65       | 899                                                  | 848         | 1645 | 1280        | 1397   | 1130        |
| nR7                         | C2     | 45,46                                      | 54,54     | 31,42       | 449                                                  | 576         | 1492 | 1136        | 1101   | 1060        |
| nR8                         | C1     | 54,00                                      | 46,00     | 32,06       | 511                                                  | 489         | 1389 | 1231        | 1096   | 1095        |
| nR8                         | C2     | 51,19                                      | 48,81     | 36,67       | 1151                                                 | 789         | 1007 | 1045        | 1108   | 814         |
| nR9                         | C1     | 42,01                                      | 57,99     | 44,17       | 10                                                   | 7           | 788  | 656         | 594    | 661         |
| nR9                         | C2     | 47,71                                      | 52,29     | 26,14       | 1312                                                 | 983         | 1193 | 787         | 1229   | 825         |
| nR10                        | C2     | 22,79                                      | 77,21     | 23,54       | 1158                                                 | 34          | 468  | 481         | 606    | 514         |
| no sample                   | C2     | 37,48                                      | 62,52     | 34,56       | na                                                   | na          | 723  | 547         | 723    | 547         |
| R3                          | nR10   | 50,67                                      | 49,33     | 32,56       | 1071                                                 | 1011        | 1166 | 1221        | 1109   | 1033        |
| R2                          | nR8    | 49,69                                      | 50,31     | 24,69       | 914                                                  | 731         | 87   | 81          | 666    | 719         |
| R2                          | R3     | 41,13                                      | 58,87     | 33,11       | 840                                                  | 288         | 1225 | 1243        | 1148   | 1112        |
| R9                          | nR9    | 32,67                                      | 67,33     | 35,93       | 400                                                  | 474         | 390  | 557         | 394    | 517         |
| C1                          | C2     | 42,93                                      | 57,07     | 32,61       | 627                                                  | 561         | 553  | 562         | 587    | 552         |

**Table S2:** Mean pre-dawn twig water potentials (TWP  $\pm$  std dev; n=4) of study trees measured in May, July, and August 2020 and mean size of hypersensitive wound reaction zones in the bark of test trees (WRZ size  $\pm$  std dev, mm<sup>2</sup>; n=4) measured six weeks after inoculation with *Grosmannia penicillata*.

| Study tree | TWP_May 20 | $\pm$ std dev | TWP_July 1 | $\pm$ std dev | TWP_Aug 5 | $\pm$ std dev | WRZ size | $\pm$ std dev |
|------------|------------|---------------|------------|---------------|-----------|---------------|----------|---------------|
| R1         | -0,93      | 0,07          | -0,63      | 0,05          | -0,68     | 0,03          | 4851     | 2041,8        |
| R2         | -1,13      | 0,27          | -0,45      | 0,04          | -0,49     | 0,05          | 1048     | 630,9         |
| R3         | -0,78      | 0,03          | -0,43      | 0,03          | -0,68     | 0,05          | 3166     | 347,8         |
| R4         | -0,78      | 0,05          | -0,67      | 0,03          | -0,63     | 0,04          | 4278     | 2520,1        |
| R5         | -0,80      | 0,04          | -0,50      | 0,00          | -0,56     | 0,10          | 2404     | 882,6         |
| R6         | -0,78      | 0,05          | -0,53      | 0,07          | -0,59     | 0,16          | 2836     | 918,8         |
| R9         | -0,86      | 0,08          | -0,59      | 0,06          | -0,50     | 0,00          | 1333     | 434,8         |
| nR1        | -0,64      | 0,11          | -0,30      | 0,06          | -0,38     | 0,03          | 2287     | 507,3         |
| nR3        | -0,50      | 0,00          | -0,34      | 0,05          | -0,42     | 0,03          | 2694     | 849,7         |
| nR4        | -0,54      | 0,05          | -0,39      | 0,03          | -0,40     | 0,04          | 1493     | 422,1         |
| nR5        | -0,61      | 0,03          | -0,30      | 0,04          | -0,41     | 0,08          | 2255     | 614,3         |
| nR7        | -0,55      | 0,04          | -0,38      | 0,03          | -0,48     | 0,07          | 1388     | 664,4         |
| nR8        | -0,56      | 0,09          | -0,39      | 0,09          | -0,39     | 0,05          | 1620     | 652,7         |
| nR9        | -0,51      | 0,03          | -0,33      | 0,03          | -0,45     | 0,00          | 1810     | 211,1         |
| nR10       | -0,74      | 0,05          | -0,36      | 0,03          | -0,38     | 0,07          | 1681     | 837,9         |

**Table S3:** Petri dish choice experiments; comparison of bark cores sampled from roofed (T=R), non-roofed (T=nR) and control (C1, C2) trees; Pearson correlations (r, significance p, number of replicates n) of the drought stress parameter pre-dawn twig water potential (TWP) measured in May, July and August 2020 and size of hypersensitive wound reaction zone (WRZ size) and proportion (%) of T choices and mean relative (%) time spent in T section by beetles, respectively; significant correlations are indicated in bold.

|             | Stress and defense parameter |    | % T Choices  |              | mean % time in T |              |
|-------------|------------------------------|----|--------------|--------------|------------------|--------------|
| Experiments | pd TWP                       | n  | r            | p            | r                | p            |
| T and C1    | May                          | 10 | <b>0,823</b> | <b>0,003</b> | <b>0,771</b>     | <b>0,009</b> |
|             | July                         | 10 | <b>0,686</b> | <b>0,028</b> | 0,469            | 0,172        |
|             | August                       | 10 | 0,387        | 0,269        | 0,387            | 0,269        |
| T and C2    | May                          | 12 | 0,209        | 0,515        | 0,231            | 0,470        |
|             | July                         | 12 | 0,233        | 0,465        | 0,180            | 0,577        |
|             | August                       | 12 | 0,385        | 0,217        | 0,434            | 0,159        |
| T and C     | May                          | 22 | 0,227        | 0,310        | <b>0,496</b>     | <b>0,019</b> |
|             | July                         | 22 | <b>0,447</b> | <b>0,037</b> | 0,347            | 0,086        |
|             | August                       | 22 | 0,367        | 0,093        | 0,410            | 0,058        |
|             | Mean (May, July, Aug)        | 22 | 0,140        | 0,535        | <b>0,574</b>     | <b>0,005</b> |
| Experiments | WRZ size                     | n  | r            | p            | r                | p            |
| T and C1    | all study trees              | 10 | 0,059        | 0,870        | 0,254            | 0,480        |
|             | without outlier R9           | 9  | 0,657        | 0,055        | 0,469            | 0,203        |
| T and C2    | all study trees              | 12 | 0,565        | 0,056        | 0,142            | 0,660        |
|             | without outlier nR8          | 11 | <b>0,815</b> | <b>0,002</b> | 0,182            | 0,593        |
| T and C     | all study trees              | 22 | 0,276        | 0,214        | 0,229            | 0,306        |
|             | without outliers R9 and nR8  | 20 | <b>0,651</b> | <b>0,003</b> | 0,398            | 0,091        |
